# Supplementary material
Source: PubMed Central journal article supplement (PMC1047091)
Supplement: pnas_102_8_2892__1.pdf [file pnas_102_8_2892__1.pdf]

### Release of microparticles from Jurkat cells by different stimuli

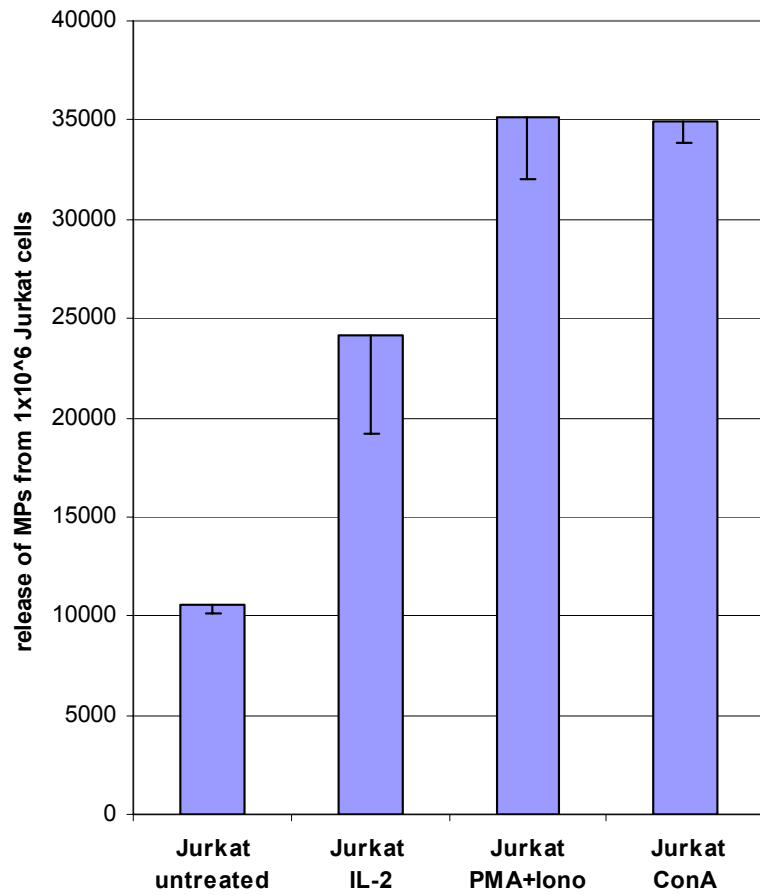

a

### Release of microparticles from primary T-cells by different stimuli

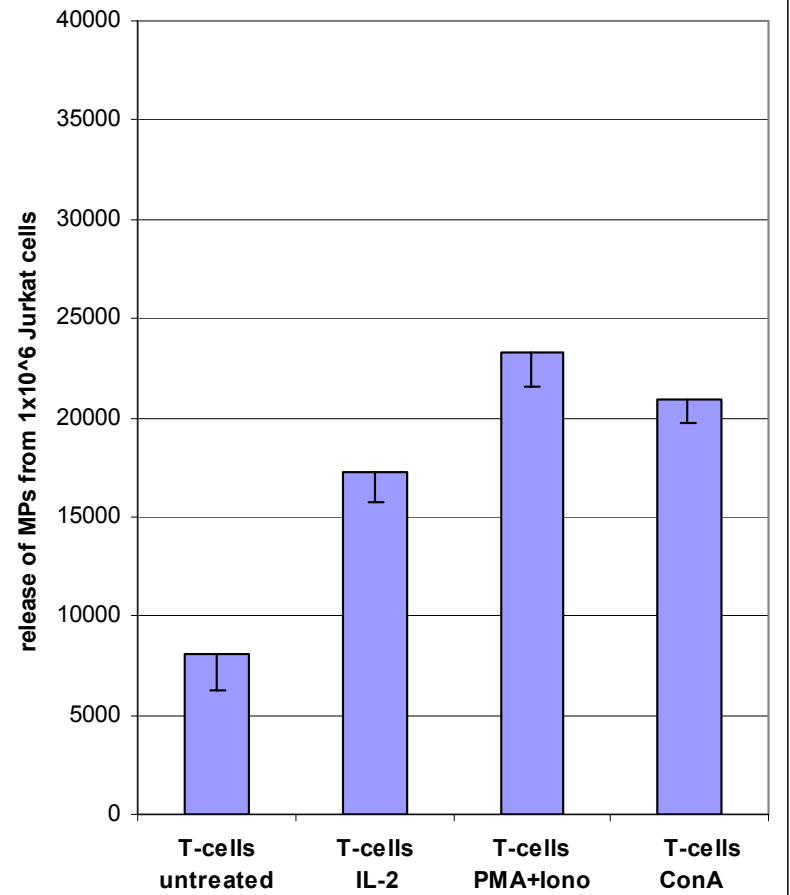

b
