# Supplementary material
Source: PubMed Central journal article supplement (PMC1047091)
Supplement: pnas_102_8_2892__2.pdf [file pnas_102_8_2892__2.pdf]

### Induction of active MMP-1 protein in synovial fibroblasts by microparticles after 36 h

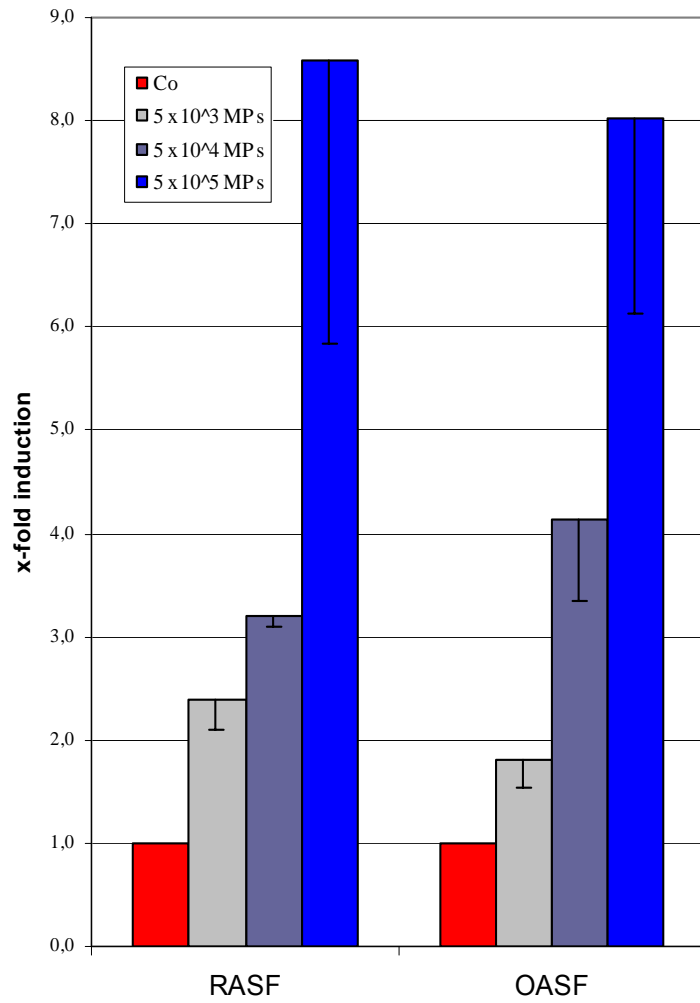

a

### Induction of active MMP-3 protein in synovial fibroblasts by microparticles after 36 h

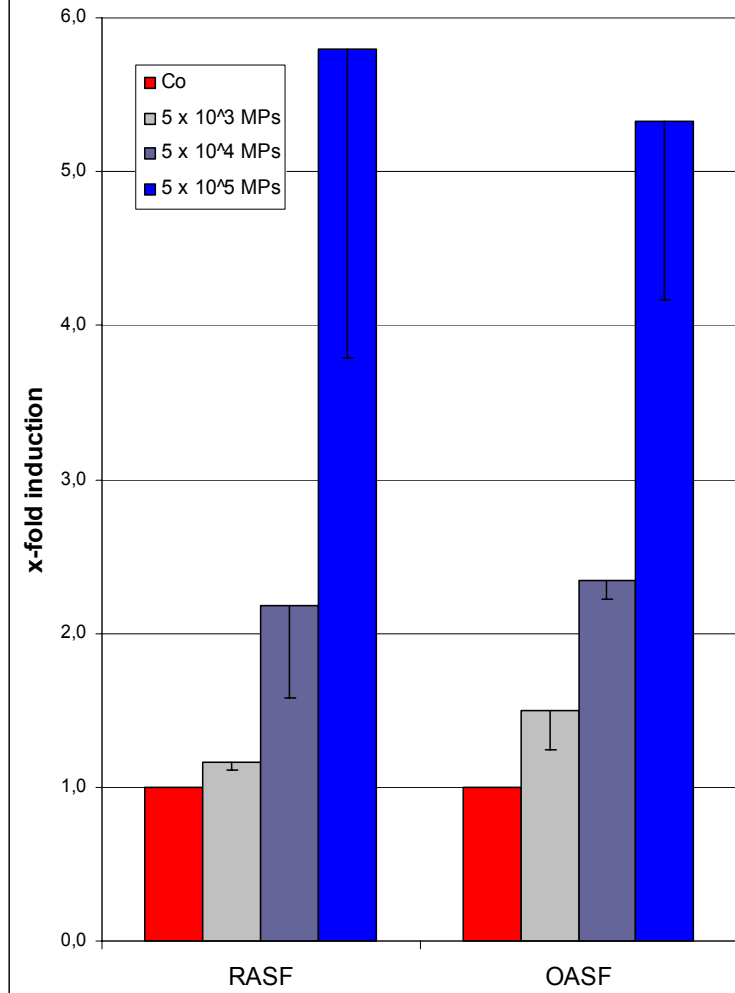

b
