# Supplementary material
Source: PubMed Central journal article supplement (PMC1047091)

### Dose-dependent induction of MMP-1 by microparticles U937 cells

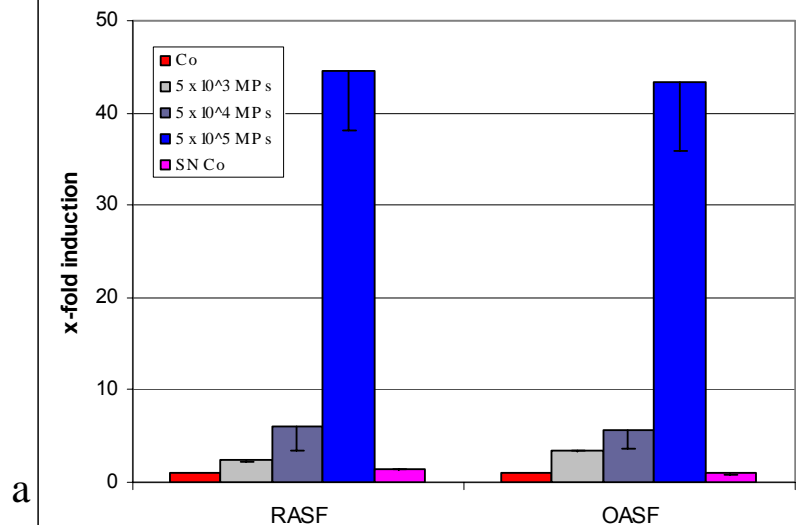

### Dose-dependent induction of MMP-3 by microparticles from U937 cells

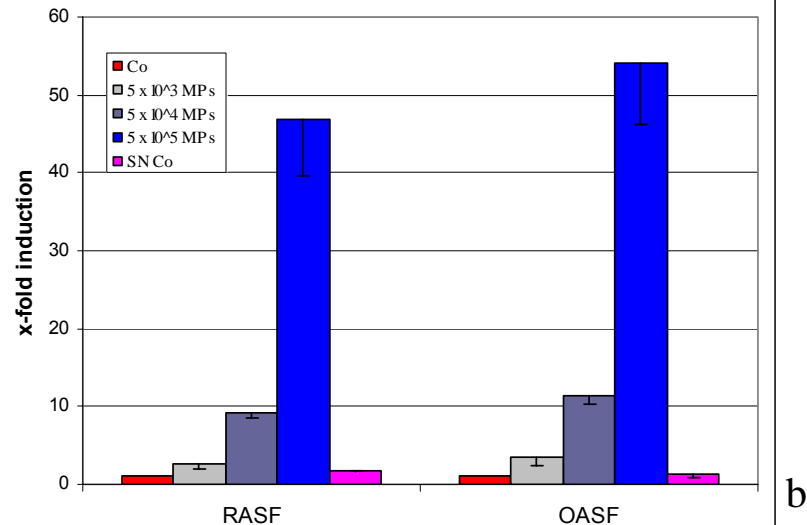

### Dose-dependent induction of MMP-9 by microparticles from U937 cells

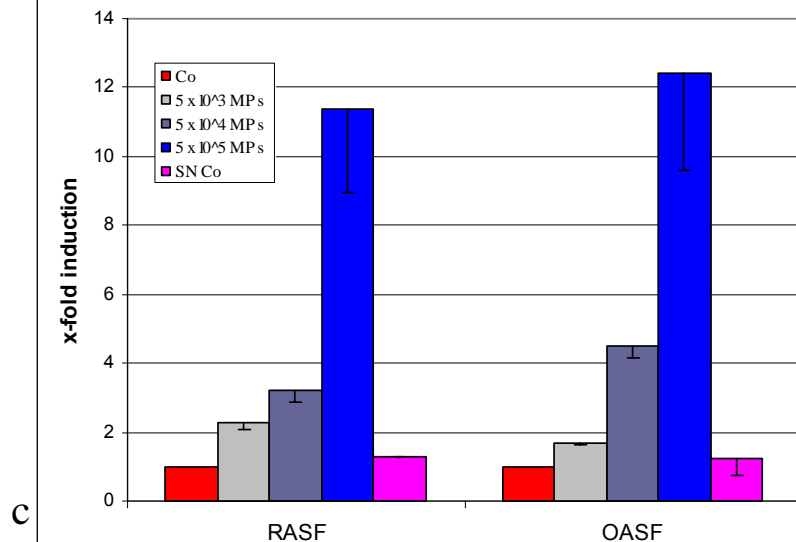

### Dose-dependent induction of MMP-13 by microparticles from U937 cells

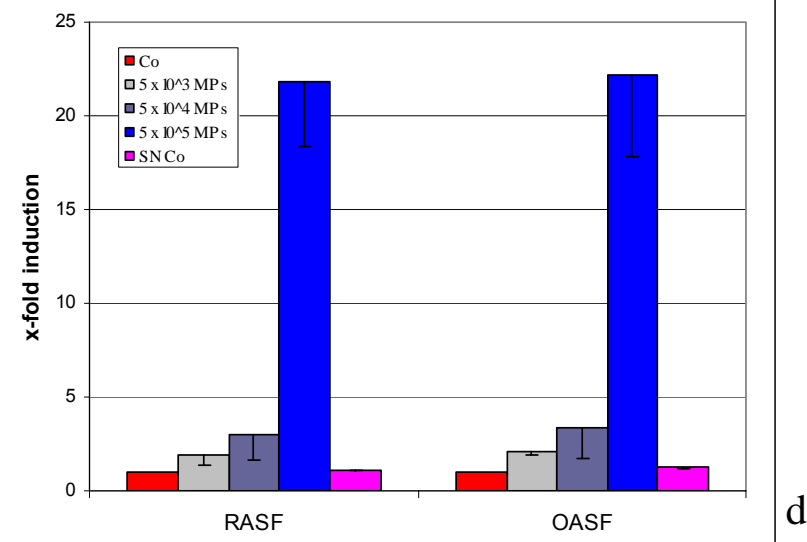

e

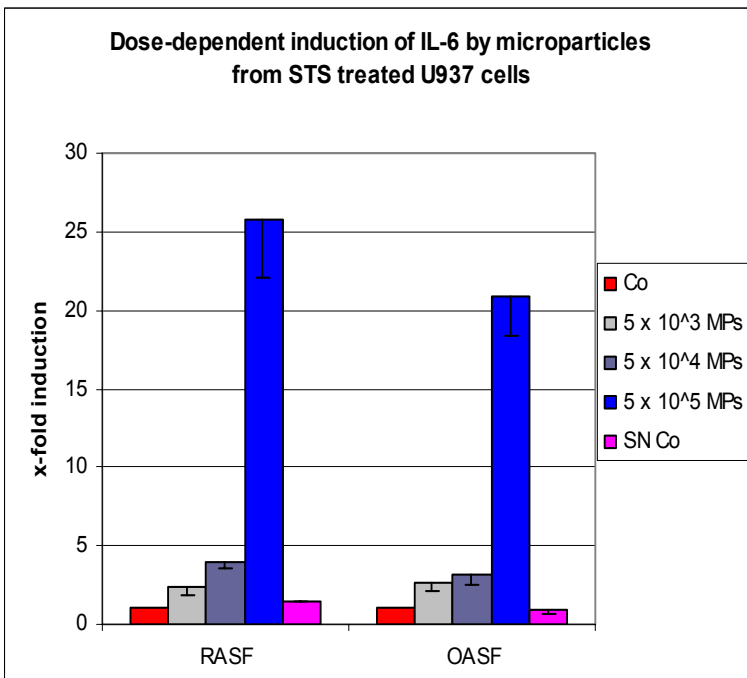

f

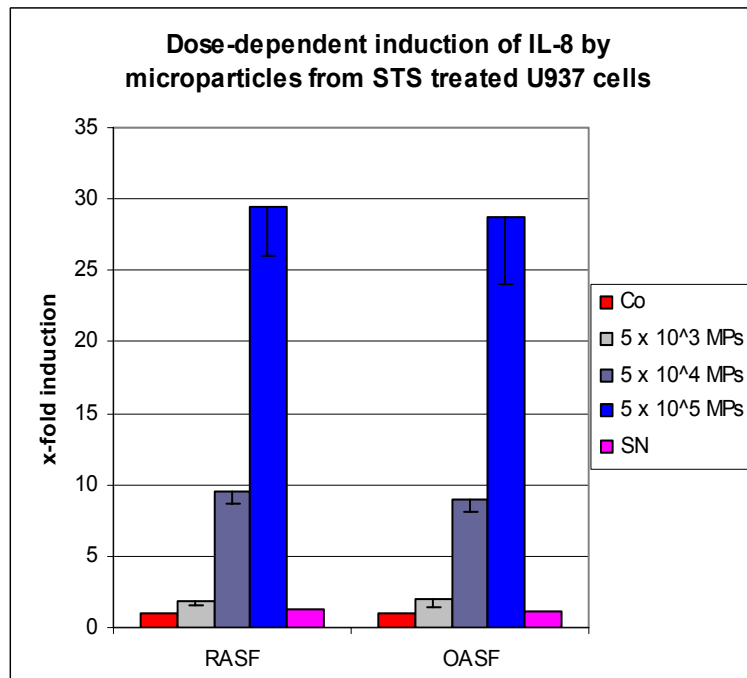

g

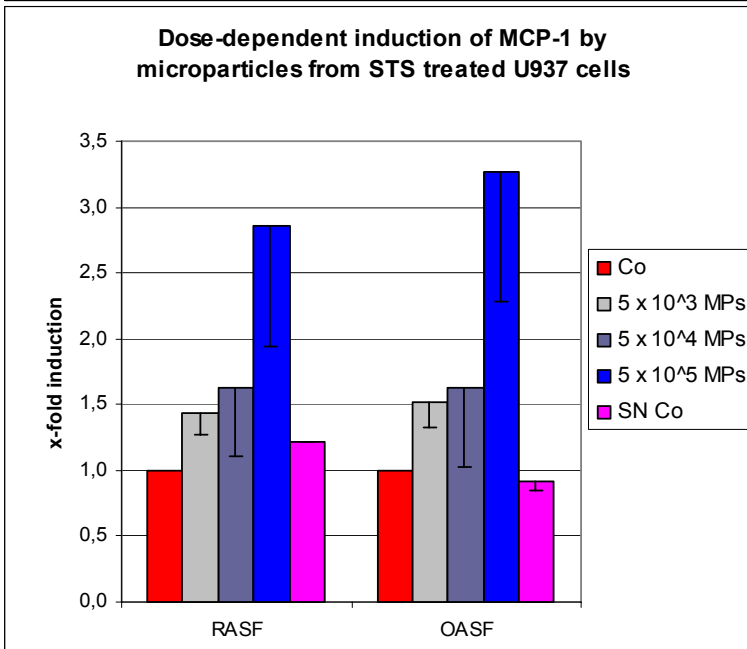

h

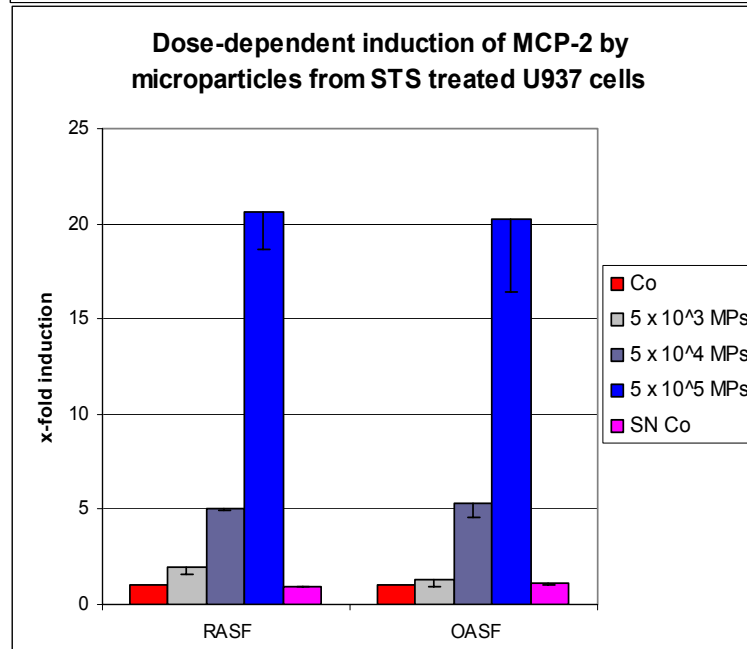

Supplement: pnas_102_8_2892__3.pdf [file pnas_102_8_2892__3.pdf]
