# Supplementary material
Source: PubMed Central journal article supplement (PMC1047091)
Supplement: pnas_102_8_2892__4.pdf [file pnas_102_8_2892__4.pdf]

**Induction of MMP-1 by microparticles from stimulated primary monocytes**

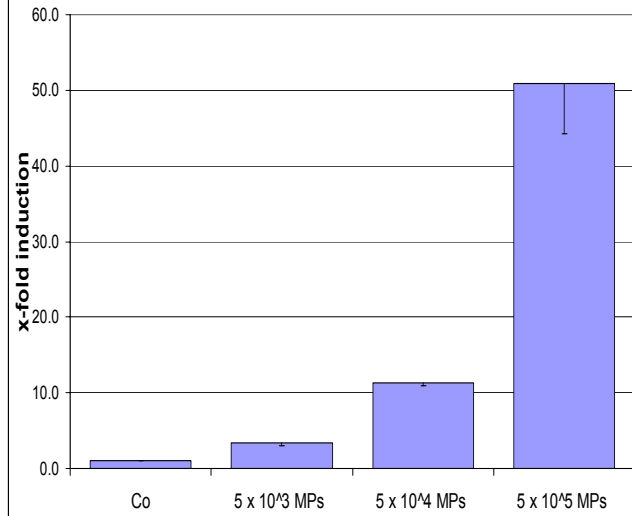

**a**

**Induction of MMP-3 by microparticles from stimulated primary monocytes**

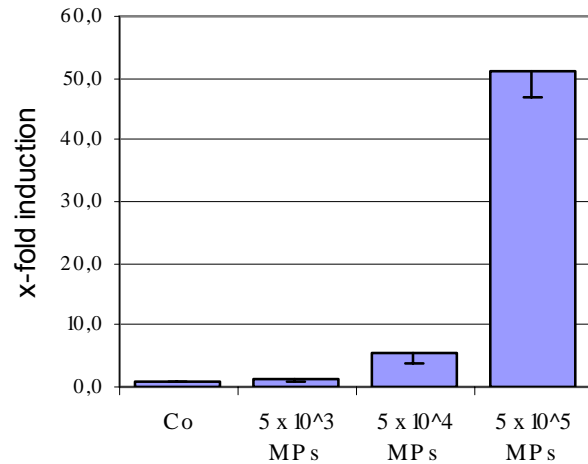

**b**

**Induction of MMP-13 by microparticles from stimulated primary monocytes**

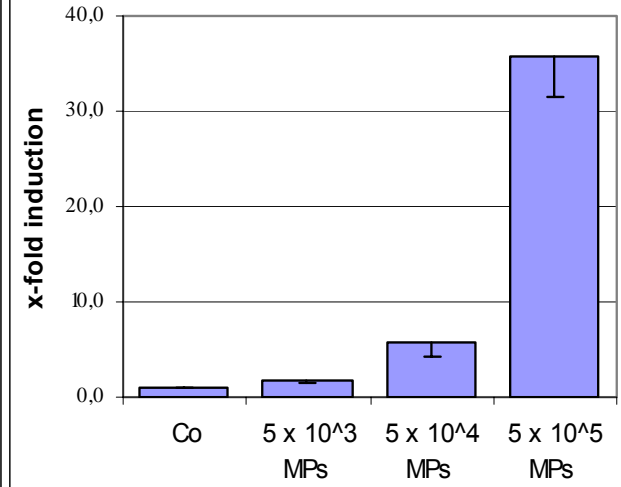

**c**

**Induction of IL-8 by microparticles from stimulated primary monocytes**

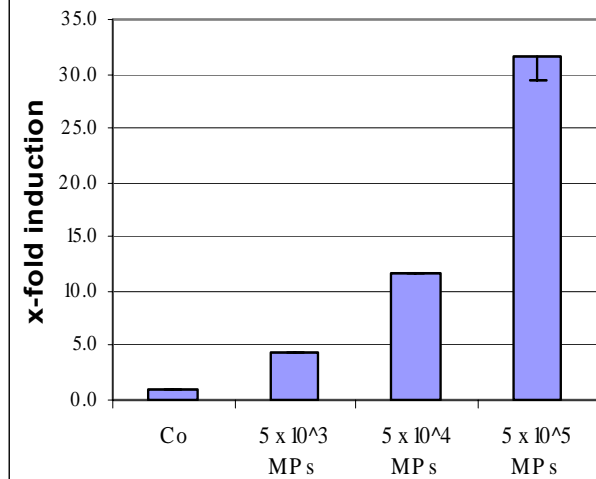

**d**

**Induction of MCP-1 by microparticles from stimulated primary monocytes**

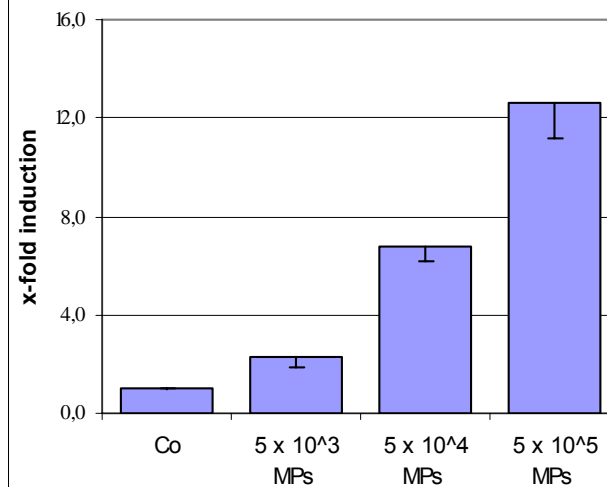

**e**

**Induction of MCP-2 by microparticles from stimulated primary monocytes**

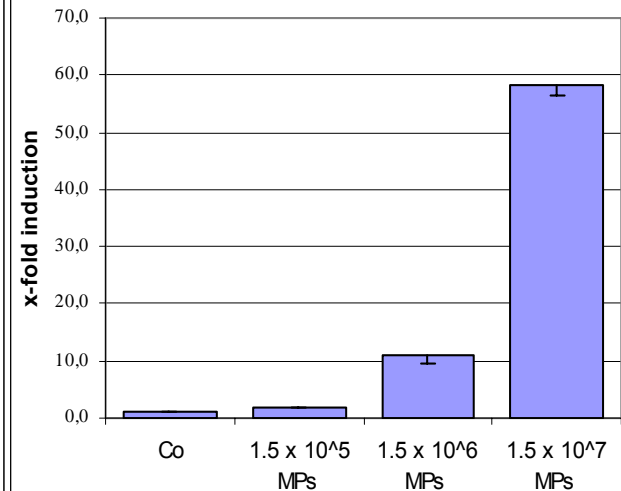

**f**
