# Supplementary material
Source: PubMed Central journal article supplement (PMC1047091)
Supplement: pnas_102_8_2892__5.pdf [file pnas_102_8_2892__5.pdf]

### Induction of MMP-1 in RASF by microparticles after 6 h and 36 h

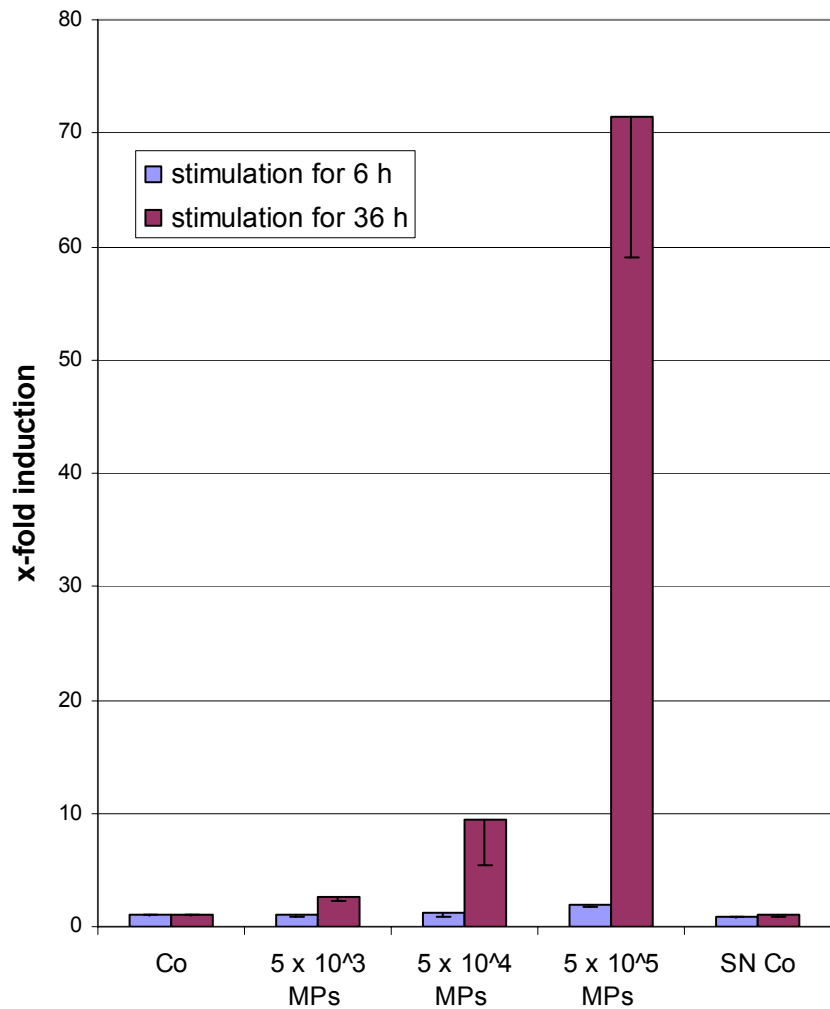

a

### Induction of IL-8 in RASF by microparticles after 6 h and 36 h

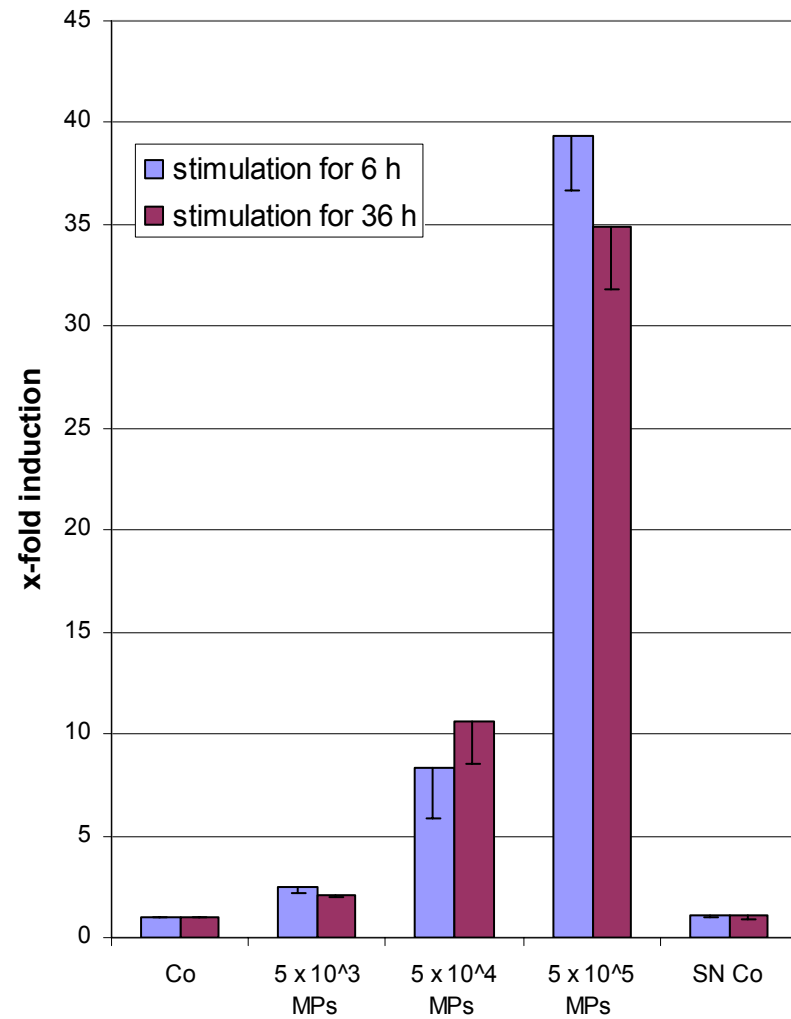

b
