# Supplementary material
Source: PubMed Central journal article supplement (PMC1047091)
Supplement: pnas_102_8_2892__6.pdf [file pnas_102_8_2892__6.pdf]

### IL-1Ra does not prevent the induction of MMP-1 by microparticles in RASF

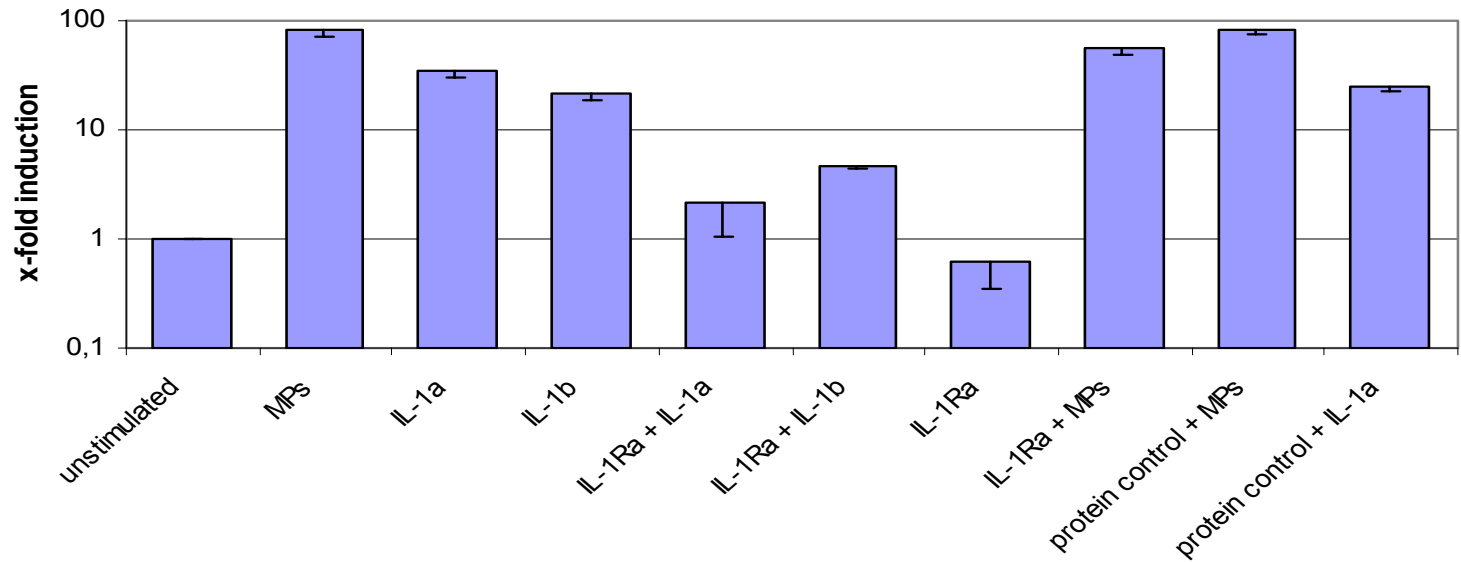

a

### IL-1Ra does not prevent the induction of IL-6 by microparticles in RASF

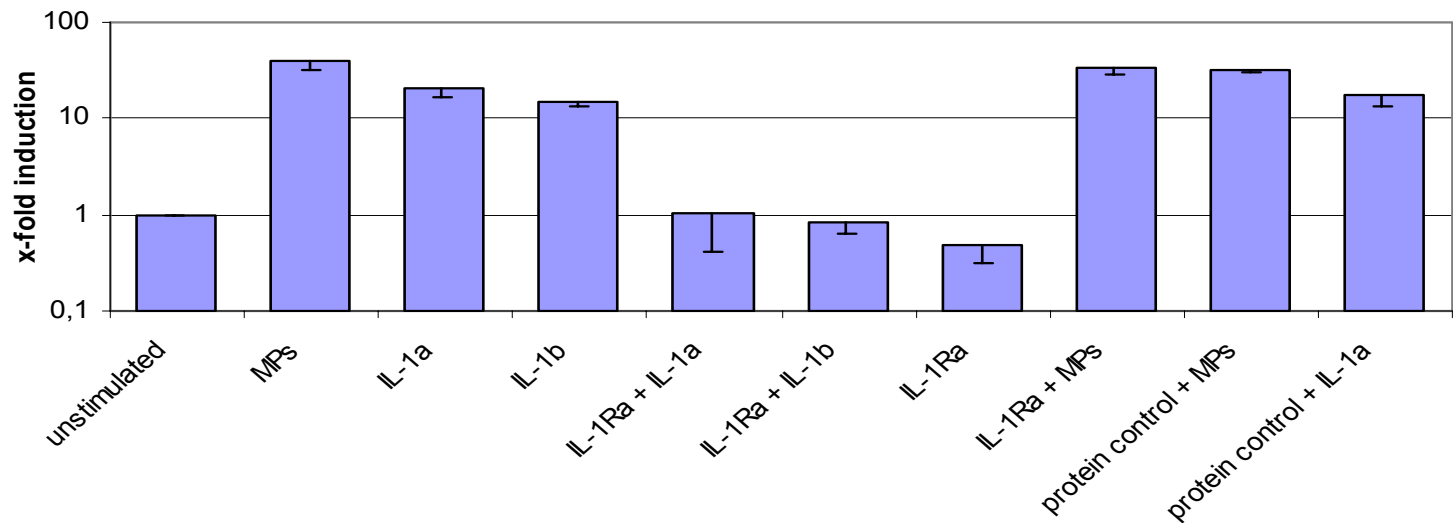

b
