# Supplementary material
Source: PubMed Central journal article supplement (PMC1047091)

## The role of NF- $\kappa$ B for the induction of MMPs by microparticles

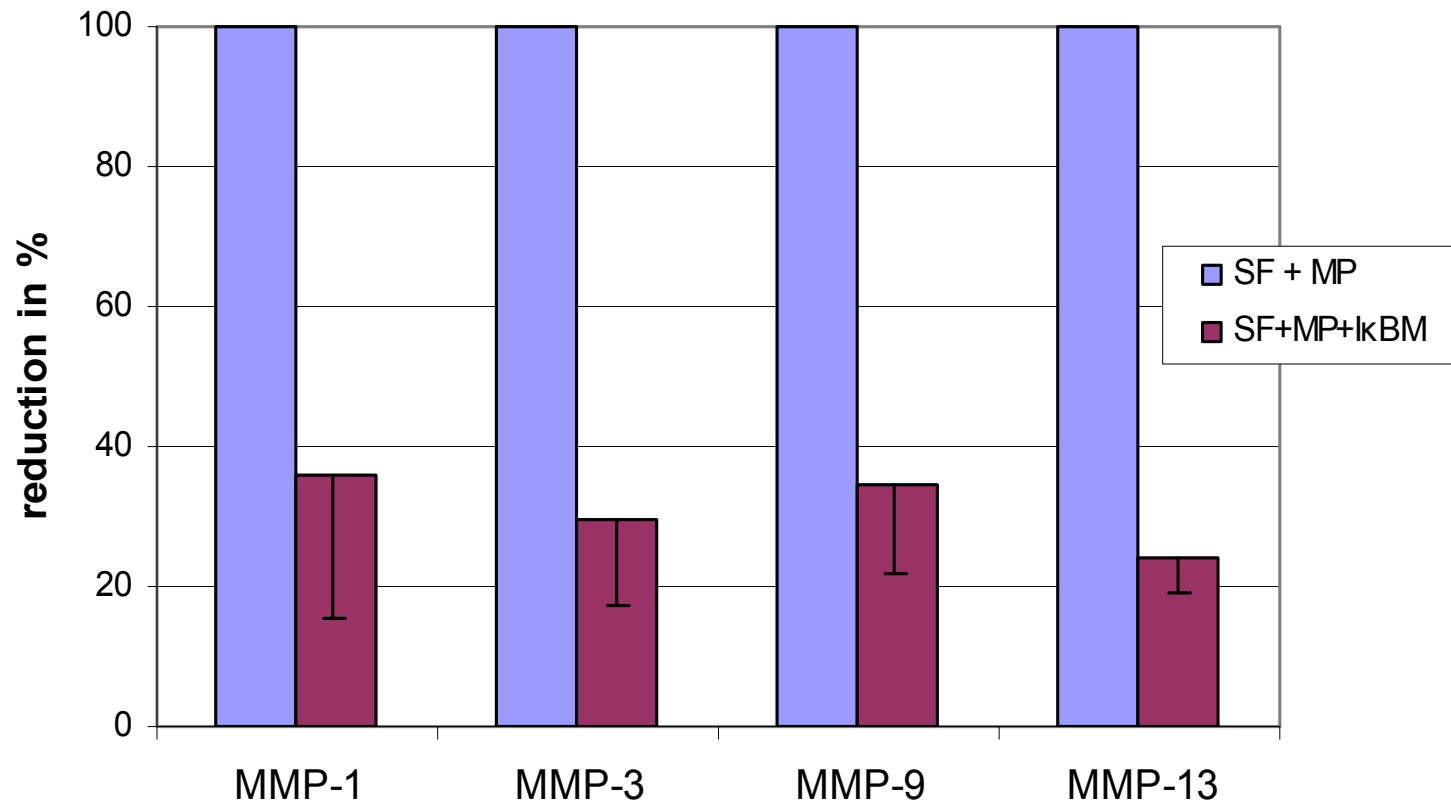

Supplement: pnas_102_8_2892__7.pdf [file pnas_102_8_2892__7.pdf]
